# Supplementary material for: Periprotein lipidomes of Saccharomyces cerevisiae provide a flexible environment for conformational changes of membrane proteins
Source: eLife. 2020 Apr 17;9:e57003. doi: 10.7554/eLife.57003 (PMC7182430; doi:10.7554/eLife.57003)
Supplement: Figure 3—source data 1. [file elife-57003-fig3-data1.xlsx]

## Sheet: Fig 3A
Lipidomics data used in figure 3A. Lipidomics of Peak areas and ratios of ergosterol over sphingolipids
chromatographic peak area (counts*sec-1)
		Pma1-MCP			Sur7-MCC			Lyp1-MCP			Lyp1-MCC			Can-MCP			Can1-MCC			Y5000			Y8000
	Ergosterol	5.90102	3.56318	3.8528	5.1516	3.0879	3.6001	6.50023	0.0842	2.7581	2.70389	0.317	3.41204	2.6781	5.2763	3.0721	5.51071	4.80814	2.77861	12.8053	12.0689	10.7536	10.7985	9.2103	8.8833
	IPC	3.03636	2.26915	1.83731	0.862	0.2601	0.8817	3.53255	1.67151	1.24029	0.391656	2.24907	1.05638	1.4136	0.6392	0.6874	1.0932	0.5394	1.3742	2.24159	2.10112	2.66682	2.002	3.75385	2.78569
	MIPC	2.11443	1.19868	0.888511	0.3963	0.1552	0.2877	2.90613	1.13732	0.92482	0.188301	1.06976	0.611155	0.9503	0.2967	0.2589	0.4863	0.3111	0.6379	1.14396	1.29216	1.52787	1.03076	1.9826	1.25136

## Sheet: Fig 3B
Lipidomics data used in figure 3B. Lipidomics of Peak areas and ratios of ergosterol over sphingolipids
Ratiometric
		Pma1-MCP			Sur7-MCC			Y5000			Y8000
	IPC/Ergosterol	0.514548	0.636833	0.476876	0.167327	0.084232	0.24491	0.175052	0.174093	0.247994	0.185396	0.407571	0.313587
	MIPC/Ergosterol	0.358316	0.336407	0.230614	0.0769276	0.0502607	0.0799144	0.0893351	0.107065	0.14208	0.0954544	0.215259	0.140866

## Sheet: Fig 3C
Lipidomics data used in figure 3C. Lipidomics of Peak areas and ratios of ergosterol over sphingolipids
Ratiometric
		Lyp1-MCP			Lyp1-MCC
	IPC/Ergosterol	0.54345	19.8517	0.449688	0.144849	7.09485	0.309604
	MIPC/Ergosterol	0.447082	13.5073	0.33531	0.0696409	3.37465	0.179117

## Sheet: Fig 3D
Lipidomics data used in figure 3D. Lipidomics of Peak areas and ratios of ergosterol over sphingolipids
Ratiometric
		Can1-MCP			Can1-MCC
	IPC/Ergosterol	0.527837	0.121145	0.223756	0.198377	0.112185	0.494564
	MIPC/Ergosterol	0.354841	0.0562326	0.0842746	0.0882463	0.0647028	0.229575
