# Supplementary material for: Periprotein lipidomes of Saccharomyces cerevisiae provide a flexible environment for conformational changes of membrane proteins
Source: eLife. 2020 Apr 17;9:e57003. doi: 10.7554/eLife.57003 (PMC7182430; doi:10.7554/eLife.57003)
Supplement: Figure 4—source data 1. [file elife-57003-fig4-data1.xlsx]

## Sheet: Fig 4A
Lipidomics data used in figure 4A. Phospholipids of SMALPs
Composition (pmol lipid/pmol protein)
	Lipid	Pma1-MCP			Sur7-MCC			Lyp1-MCP			Lyp1-MCC			Can-MCP			Can1-MCC
	PC	32.6042	40.6323	34.7356	35.8264	16.8496	18.3093	49.7408	37.0112	17.1554	25.6486	39.3301	19.1625	45.6488	25.758	26.049	31.075	24.2724	14.2891
	PI	13.8677	19.4937	13.8734	13.3311	5.2447	7.10173	21.1179	15.0179	6.26443	9.1028	17.237	7.79068	20.8897	10.9512	10.7201	14.0016	9.99363	5.81365
	PE	14.0333	19.8976	13.1842	8.65046	4.50298	3.92271	17.144	21.4063	6.89255	9.57232	17.6031	7.29712	18.6526	11.9247	11.6067	16.5963	10.6638	6.45247
	PS	12.5463	16.787	14.406	17.0239	7.26895	10.0819	14.7198	12.2166	4.69728	8.58783	16.113	7.301	17.2624	10.7691	10.5508	12.4541	8.58358	4.28528
	PG	0.10075	0.334668	0.101609	0	0	0	0.525432	0.475541	0.0374934	0.0209022	0.336018	0.0795577	0.327121	0.0699926	0.0643123	0.0928939	0.0503208	0.0628594
	CL	1.03846	1.45084	1.03247	0.091183	0.0241939	0.0343069	1.79673	1.18394	0.373124	0.506784	1.18673	0.519803	1.43758	0.739716	0.680372	0.893225	0.657439	0.391164
	PA	0.635409	0.799919	0.49643	0	0	0	0.900305	0.507726	0.129269	0.277076	0.665945	0.21747	0.895671	0.438599	0.330893	0.544612	0.464856	0.0915874
	Erg	3.93278	2.15319	2.36417	3.3422	1.81212	2.17995	4.42058	0	1.57906	1.54103	0	2.04404	1.52296	3.43905	1.80089	3.62262	3.07822	1.59347

## Sheet: Fig 4B
Lipidomics data used in figure 4B. Phospholipids of SMALPs
Composition (pmol lipid/pmol protein)
	Lipid	Pma1-MCP			Sur7-MCC			Lyp1						Can1
	PC	32.6042	40.6323	34.7356	35.8264	16.8496	18.3093	49.7408	37.0112	17.1554	25.6486	39.3301	19.1625	45.6488	25.758	26.049	31.075	24.2724	14.2891
	PI	13.8677	19.4937	13.8734	13.3311	5.2447	7.10173	21.1179	15.0179	6.26443	9.1028	17.237	7.79068	20.8897	10.9512	10.7201	14.0016	9.99363	5.81365
	PE	14.0333	19.8976	13.1842	8.65046	4.50298	3.92271	17.144	21.4063	6.89255	9.57232	17.6031	7.29712	18.6526	11.9247	11.6067	16.5963	10.6638	6.45247
	PS	12.5463	16.787	14.406	17.0239	7.26895	10.0819	14.7198	12.2166	4.69728	8.58783	16.113	7.301	17.2624	10.7691	10.5508	12.4541	8.58358	4.28528
	PG	0.10075	0.334668	0.101609	0	0	0	0.525432	0.475541	0.0374934	0.0209022	0.336018	0.0795577	0.327121	0.0699926	0.0643123	0.0928939	0.0503208	0.0628594
	CL	1.03846	1.45084	1.03247	0.091183	0.0241939	0.0343069	1.79673	1.18394	0.373124	0.506784	1.18673	0.519803	1.43758	0.739716	0.680372	0.893225	0.657439	0.391164
	PA	0.635409	0.799919	0.49643	0	0	0	0.900305	0.507726	0.129269	0.277076	0.665945	0.21747	0.895671	0.438599	0.330893	0.544612	0.464856	0.0915874
	Erg	3.93278	2.15319	2.36417	3.3422	1.81212	2.17995	4.42058	0	1.57906	1.54103	0	2.04404	1.52296	3.43905	1.80089	3.62262	3.07822	1.59347

## Sheet: Fig 4C
Lipidomics data used in figure 4C. Phospholipids of SMALPs
Relative abundance (%)
		Y8000 strain
	Lipid	Pma1-MCP	Can1-MCP	Can1-MCC	Lyp1-MCP	Lyp1-MCC
	PC	41.4477	41.911	40.9051	44.157	43.7913
	PI	18.1323	18.3034	17.51	18.0186	17.7632
	PE	18.0863	18.1413	19.8031	19.3117	17.9412
	PS	16.7904	16.5923	14.875	13.4432	16.6554
	Ergosterol	3.24379	2.90839	4.87216	2.54964	1.86585

## Sheet: Fig 4D
Lipidomics data used in figure 4D. Phospholipids of SMALPs
Relative abundance (%)
		Y8000 strain		Y5000 strain
	Lipid	membrane	Pma1-MCP	Membrane	Sur7-MCC
	PC	33.7388	41.911	33.3808	46.0457
	PI	16.7078	18.3034	17.0248	16.6562
	PE	19.1845	18.1413	11.3847	11.0767
	PS	5.21771	16.5923	8.81216	21.3668
	Ergosterol	24.7215	2.90839	29.3052	4.75749

## Sheet: Fig 4E
Lipidomics data used in figure 4E. Phospholipids of SMALPs
Relative abundance (%) acyl chains in a sample
	background strain	Y8000								Y5000
	sample	Membrane				Pma1-MCP				Membrane				Sur7-MCC
	Acyl chain/lipid species	PC	PI	PE	PS	PC	PI	PE	PS	PC	PI	PE	PS	PC	PI	PE	PS
	C26:0	0	0.619256	0	0	0	0.238293	0.0778085	0	0	0.382707	0	0	0	0.0899295	0	0
	C26:1	0	0	0	0	0.364362	0	0	0	0	0	0	0	0	0	0	0
	C28:0	0	1.2548	0	0	0.133701	0.711139	0.0881005	0	0	0.770764	0	0	0.217024	0.299677	0	0
	C28:1	1.25792	0	0.330001	0	1.1935	0.16839	0.428621	0	0.398812	0	0.0855184	0	0.455364	0	0	0
	C30:1	1.50042	0.74216	0.546433	0	1.4121	0.898794	0.58888	0	0.528691	0.124847	0.0463758	0	0.495288	0	0	0
	C30:2	1.1809	0	0	0	1.60856	0	0.264818	0	0.100089	0	0	0	0.349597	0	0	0
	C32:1	4.68337	5.59787	3.0824	0.57297	2.17732	4.5239	2.30083	2.93436	9.6715	5.42888	1.18065	0.602786	7.72671	3.74148	1.10484	1.97403
	C32:2	21.9683	1.82987	5.76455	0	21.3619	1.56775	4.55349	2.59546	16.4273	1.39357	4.4111	0	15.6198	1.06781	3.55132	2.58138
	C34:1	2.20537	8.37332	2.21935	1.0462	1.82874	6.99015	1.96437	3.5889	7.55053	11.4321	1.51304	1.56966	6.42399	8.24933	1.21968	4.37184
	C34:2	16.7245	1.90067	9.79873	1.88514	12.1471	1.77078	7.00865	8.17787	17.2458	1.80693	6.82695	3.90579	14.4657	1.61392	4.78517	12.9563
	C36:1	0.319409	2.22296	0	0.0963128	0.237849	1.89165	0	0.228345	1.15972	3.03384	0	0.209263	1.16074	2.22455	0	0.550606
	C36:2	0.909034	0.204786	1.16291	0	0.795787	0.164661	1.60195	0	1.4147	0.22051	0.557678	0	1.43152	0.20146	0.969002	0
